# Supplementary material
Source: Springer Nature journal article supplement (https://www.springermedizin.de/resource/supplementary/12978_2010_259_MOESM4_ESM.pdf/9602852)
Supplement: MOESM4 [file 9602852]

**O<sub>1</sub>** ————— **X<sub>1</sub>: CBI + Wives IEEC only** —————> **O<sub>2</sub>**

**O<sub>1</sub>** ————— **X<sub>2</sub>: CBI + Couples' IEEC** —————> **O<sub>2</sub>**

**O<sub>1</sub>** ————— **Control** —————> **O<sub>2</sub>**
